# Supplementary material for: Genetic Polymorphisms in Arsenic Metabolism and Oxidative Stress Genes Linked to Increased Cardiovascular Disease Risk in Arsenic Exposed Bangladeshi Population
Source: Research Square preprint supplement (doi:10.21203/rs.3.rs-5750155/v1), 2025-01-06
Supplement: Supplementary file 1 [file 280544d58cf22af073619ae2.docx]

**Title:** **Genetic Polymorphisms in Arsenic Metabolism and Oxidative Stress Genes Linked to Increased Cardiovascular Disease Risk in Arsenic Exposed Bangladeshi Population**

Partha Guha1,2, Anika Nowshin1, Rahee Hasan Chowdhury1, Md. Jibran Alam1, Amit Datta1,2, Inzamamul Ismail Shawon1, Amlan Bhattacharjee1,6, Fahmida Binta Wali1,3, Nazmul Hosain4, Mohammad Fazle Maruf4, Md. Zillur Rahman5, Laila Khaleda1 and Mohammad Al-Forkan1*

1Functional Genomics and Proteomics Laboratory, Department of Genetic Engineering and Biotechnology, Faculty of Life Sciences, University of Chittagong, Chittagong-4331, Bangladesh. 2Department of Biochemistry and Biotechnology, University of Science and Technology Chittagong (USTC), Foy’s Lake, Chittagong-4202, Bangladesh. 3Department of Environmental Biotechnology, Faculty of Biotechnology and Genetic Engineering, Chattogram Veterinary and Animal Sciences University (CVASU), Chittagong, Bangladesh. 4Department of Cardiac Surgery, Chattogram Medical College and Hospital, Chittagong-4203, Bangladesh, 5Bangabandhu Sheikh Mujib Medical University, Dhaka, Bangladesh. 6Department of Medical Biochemistry and Microbiology, Uppsala University, Uppsala, Sweden.

***Corresponding Author:**

**Mohammad Al-Forkan**

Professor

Address: Department of Genetic Engineering and Biotechnology, Faculty of Life Sciences, University of Chittagong, Chittagong-4331, Bangladesh.

**E-mail:** [**alforkangeb@cu.ac.bd**](mailto:alforkangeb@cu.ac.bd)

**Supplementary Table 1** Correlation between genetic polymorphisms and patients' characteristics: age and BMI

| **Variables** | **Gene** | **SNP Loci** | **Genotype** | | | ***P* value** |
| --- | --- | --- | --- | --- | --- | --- |
| **AA** | **Aa** | **aa** |
| **Age (years)** | *AS3MT* | rs3740390 (C/T) | 53.23±1.45 | 50.67±2.03 | 42.00±8.67 | 0.060 |
| rs3740393 (G/C) | 52.78±1.55 | 53.18±1.82 | 42.20±6.76 | **0.043** |
| rs10748835 (G/A) | 52.08±2.83 | 51.55±1.88 | 51.25±3.23 | 0.978 |
| rs11191454 (A/G) | 53.07±1.41 | 51.88±1.85 | 40.25±8.51 | **0.026** |
| *SOD2* | rs2758331 (C/A) | 52.13±3.14 | 50.08±1.84 | 55.78±2.67 | 0.271 |
| rs2758334 (T/C) | 50.67±2.10 | 50.47±2.28 | 55.78±2.83 | 0.059 |
| rs8031 (A/T) | 50.67±2.10 | 50.47±2.28 | 55.78±2.83 | 0.317 |
| *NOS3* | rs3918181 (G/A) | 54.93±1.77 | 49.88±2.04 | 50.00±4.64 | 0.227 |
| rs3918188 (C/A) | 52.88±1.62 | 51.00±2.98 | 47.20±4.33 | 0.434 |
| rs2853792 (G/A) | 55.10±2.46 | 52.31±1.92 | 49.50±2.38 | 0.276 |
| **BMI** | *AS3MT* | rs3740390 (C/T) | 24.44±0.39 | 22.73±0.77 | 21.06±1.07 | **0.007** |
| rs3740393 (G/C) | 24.39±0.42 | 23.42±0.74 | 21.17±0.85 | **0.015** |
| rs10748835 (G/A) | 22.65±0.63 | 24.64±0.44 | 23.18±0.99 | **0.041** |
| rs11191454 (A/G) | 24.35±0.38 | 22.68±0.87 | 21.45±1.37 | **0.024** |
| *SOD2* | rs2758331 (C/A) | 24.13±0.71 | 23.93±0.46 | 22.97±0.99 | 0.529 |
| rs2758334 (T/C) | 22.97±0.79 | 24.10±0.48 | 23.76±0.81 | 0.468 |
| rs8031 (A/T) | 23.59±0.63 | 23.66±0.59 | 24.29±0.75 | 0.765 |
| *NOS3* | rs3918181 (G/A) | 23.67±0.70 | 23.58±0.45 | 25.24±1.12 | 0.444 |
| rs3918188 (C/A) | 23.74±0.46 | 23.72±0.81 | 24.00±0.75 | 0.975 |
| rs2853792 (G/A) | 23.25±0.96 | 23.38±0.53 | 24.28±0.53 | 0.436 |

In this chart, “A” denotes the first allele and “a” denotes the second allele for every SNP of *AS3MT*, *SOD2* and *NOS3* genes. Age and BMI were shown as mean ± S.E.M and analyzed by ANOVA. Significance level, *P*<0.05

**Supplementary Table 2** Association of nail-As concentration and genetic polymorphism

| **Gene** | **SNP Loci** | **Genotype** | **Mean ± S.E.M** | ***P* value** |
| --- | --- | --- | --- | --- |
| *AS3MT* | rs3740390 (C/T) | CC | 518.85±208.89 | 0.434 |
| CT+TT | 340.72±83.31 |
| rs3740393 (G/C) | GG | 546.23±232.09 | 0.373 |
| GC+CC | 327.92±65.79 |
| rs10748835 (G/A) | GG | 675.55±472.21 | 0.538 |
| GA+AA | 373.76±65.39 |
| rs11191454 (A/G) | AA | 510.39±202.44 | 0.465 |
| AG+GG | 347.73±86.54 |
| *SOD2* | rs2758331 (C/A) | CC | 246.26±42.79 | 0.156 |
| CA+AA | 514.99±180.47 |
| rs2758334 (T/C) | TT | 253.93±46.75 | 0.171 |
| TC+CC | 528.96±191.08 |
| rs8031 (A/T) | AA | 727.03±402.31 | 0.340 |
| AT+TT | 324.63±70.54 |
| *NOS3* | rs3918181 (G/A) | GG | 273.27±71.04 | 0.217 |
| GA+AA | 567.71±222.49 |
| rs3918188 (C/A) | CC | 564.48±244.59 | 0.373 |
| CA+AA | 326.82±96.46 |
| rs2853792 (G/A) | GG | 391.79±172.26 | 0.709 |
| GA+AA | 487.18±186.15 |

The data were shown as mean ± S.E.M and analyzed by student’s *t-*test. Significance level, *P*<0.05

**Supplementary Table 3** Linkage disequilibrium analysis among SNPs of *AS3MT*

| **D’/r2 Table** | **rs3740390(C/T)** | **rs340393(G/C)** | **rs10748835(G/A)** | **rs11191454(A/G)** |
| --- | --- | --- | --- | --- |
| rs3740390(C/T) | - | 0.752 | 0.133 | 0.840 |
| rs340393(G/C) | 0.432 | - | 0.184 | 0.825 |
| rs10748835(G/A) | 0.006 | 0.014 | - | 0.063 |
| rs11191454(A/G) | 0.655 | 0.481 | 0.001 | - |

*D*´ values forming the right upper triangle (Green colored); *r2* values forming the lower left triangle (Red colored)

**Supplementary Table 4** Linkage disequilibrium analysis among SNPs of *SOD2*

| **D’/r2 Table** | **rs2758331(C/A)** | **rs275834(A/G)** | **rs8031(A/T)** |
| --- | --- | --- | --- |
| rs2758331(C/A) | - | 0.719 | 0.300 |
| rs275834(A/G) | 0.472 | - | 0.690 |
| rs8031(A/T) | 0.065 | 0.377 | - |

*D*´ values forming the right upper triangle (Green colored); *r2* values forming the lower left triangle (Red colored)

**Supplementary Table 5** Linkage disequilibrium analysis among SNPs of *NOS3*

| **D’/r2 Table** | **rs3918181(G/A)** | **rs3918188(C/A)** | **rs2853792(G/A)** |
| --- | --- | --- | --- |
| rs3918181(G/A) | - | 0.842 | 0.317 |
| rs3918188(C/A) | 0.437 | - | 0.278 |
| rs2853792(G/A) | 0.037 | 0.018 | - |

*D*´ values forming the right upper triangle (Green colored); *r2* values forming the lower left triangle (Red colored)

**Supplementary Table 6** Average cardiac tissue injury score

| **Cardiac Tissue Injury Score (Mean± S.E.M)** | | | | |  |
| --- | --- | --- | --- | --- | --- |
| **Parameters** | **Patients from >50 ppb**  **As areas**  **(n=16)** | **Patients from >10-50 ppb As areas**  **(n=12)** | **Total**  **patients from As-affected areas***  **(n=28)** | **Patients from As-unaffected**  **areas**  **(n=15)** | ***P* value** |
| **Edema** | 1.44±0.16 | 1.5±0.26 | 1.46±0.14 | 0.93±0.12 | **0.006** |
| **Leukocyte**  **infiltration** | 0.69±0.15 | 0.58±0.19 | 0.64±0.12 | 0.47±0.14 | 0.328 |
| **Fibrosis** | 0.75±0.17 | 0.50±0.19 | 0.64±0.13 | 0.47±0.13 | 0.348 |
| **Myocardial**  **fiber swelling** | 1.06±0.11 | 0.75±0.18 | 0.93±0.10 | 0.93±0.21 | 0.984 |
| **Fiber separation** | 1.13±0.16 | 1.25±0.28 | 1.18±0.15 | 0.73±0.18 | 0.065 |
| **Fatty change** | 1.0±0.21 | 0.83±0.21 | 0.93±0.15 | 0.60±0.13 | 0.100 |
| **Necrosis** | 0.25±0.15 | 0.25±0.18 | 0.25±0.11 | 0.20±0.15 | 0.786 |
| ***P*= 0.033** | |  |

The data were shown as Mean ± S.E.M value.

*Patients from As-affected areas (n=28) comprise both patients from >50 ppb As areas (n=16) and patients from >10-50 ppb As areas (n=12).

Student’s *t*-test was performed between the patients’ group of As-affected areas and the patients’ group of unaffected areas. Significance level, *P*<0.05

**Supplementary Table 7** Association of cardiac tissue injury score with genetic polymorphism

| **Variable** | **Gene** | **SNP loci** | **Genotype** | | | ***P* value** |
| --- | --- | --- | --- | --- | --- | --- |
| **AA** | **Aa** | **aa** |
| Cardiac tissue injury score | *AS3MT* | rs3740390 (C/T) | 5.40±0.43 | 5.22±0.59 | 6.25±1.44 | 0.746 |
| rs3740393 (G/C) | 5.56±0.51 | 5.36±0.36 | 5.00±0.84 | 0.877 |
| rs10748835 (G/A) | 5.39±0.79 | 5.82±0.40 | 4.50±0.71 | 0.372 |
| rs11191454 (A/G) | 5.42±0.454 | 5.63±0.49 | 5.25±0.75 | 0.960 |
| *SOD2* | rs2758331 (C/A) | 5.75±1.07 | 5.27±0.36 | 5.67±0.94 | 0.829 |
| rs2758334 (T/C) | 4.90±0.93 | 5.25±0.39 | 6.56±0.73 | 0.232 |
| rs8031 (A/T) | 5.07±0.79 | 5.37±0.45 | 6.22±0.22 | 0.478 |
| *NOS3* | rs3918181 (G/A) | 5.13±0.60 | 5.75±0.48 | 4.75±0.63 | 0.585 |
| rs3918188 (C/A) | 5.64±0.46 | 5.46±0.67 | 4.40±0.81 | 0.542 |
| rs2853792 (G/A) | 4.60±0.89 | 6.08±0.35 | 5.45±0.54 | 0.303 |

In this chart, “A” denotes the first allele and “a” denotes the second allele for every SNP of *AS3MT*, *SOD2* and *NOS3* genes. Tissue injury scores were shown as mean ± S.E.M and analyzed by ANOVA. Significance level, *P*<0.05

**Supplementary Table 8** List of primer sequences, amplicon size, and PCR annealing temperature of selected SNPs of the studied genes

| **Gene** | **SNP** | **Primer Sequence**  **(5’-3’)** | **Amplicon size** | **Annealing Temperature** |
| --- | --- | --- | --- | --- |
| *AS3MT* | rs3740390 (C>T) | F: TGGTTGGTCCTGTCTTAGAGTG | 319 BP | 59oC/30sec |
| R: GAGTCTCATTGAGGGATACTT |
| rs3740393 (G>C) | F: CCTGTTGGATAAGCCACTGGGAG | 294 BP | 65oC/30sec |
| R: CCCCATAAAACTTTGTGTGTCCTG |
| rs10748835 (G>A) | F: CACGTGCAAATGACAACCCCA | 227 BP | 54.3oC/30sec |
| R: GTTTGATTTAGGTTGACTTACA |
| rs11191454 (A>G) | F: CTGAGATCTGTCTGGCCATTG | 227 BP | 59oC/30sec |
| R: TTCTGCCATAAAGGCACTTGCTTC |
| *SOD2* | rs2758331 (C>A) | F: CCTGTGAAGTGAGCCACAGA | 458 BP | 58oC/45sec |
| R: ACCCTGCTTCATTCTACAGAGA |
| rs2758334 (T>C) | F: GCGTTCCTGTTCCTCCTTCAAGTC | 401 BP | 59oC/30sec |
| R: ACGTACACTTTCAGAACAGCAG |
| rs8031 (A>T) | F: CAAGTATTGTTCATCCAAGAAGGG | 401 BP | 59oC/30sec |
| R: ACCTAATAATAGCTTTCCCAAACAG |
| *NOS3* | rs3918181 (G>A) | F: CAACAGTGCAGGTGAATCTCA | 215 BP | 52oC/30sec |
| R: CAAACATTACCCGCATCCT |
| rs3918188 (C>A) | F: CAAGTGGGGATTCAGCAACTCC | 118 BP | 62.5oC/30sec |
| R: AGCTCGGTGGTCTGGGAACAG |
| rs2853792 (G>A) | F: AGAGGTTAGACTGTGCTCGG | 385 BP | 57.5oC/30sec |
| R: GCTTGCAAGAGAAGGAATTCA |
